# Supplementary material for: Preventive Ventricular Tachycardia Ablation in Patients with Ischaemic Cardiomyopathy: Meta-analysis of Randomised Trials
Source: PubMed Central journal article supplement — Arrhythm Electrophysiol Rev. 2019 Jul;8(3):173–9. doi: 10.15420/aer.2019.31.3 (PMC6702470; doi:10.15420/aer.2019.31.3), 2019-07
Supplement: aer-08-173-SupFig.pdf [file aer-08-173-SupFig.pdf]

**SUPPLEMENTAL FIGURE 1: Flow Chart**

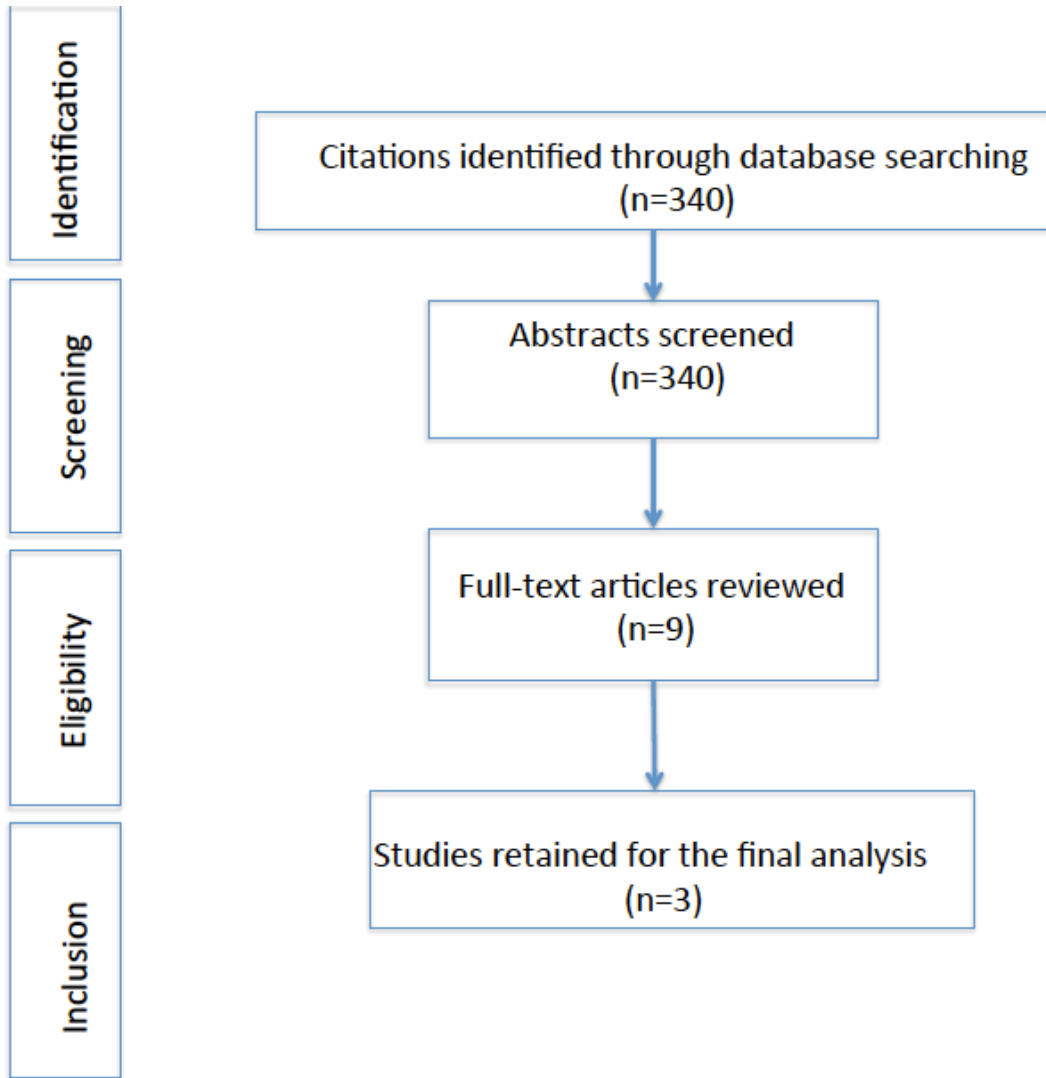

## SUPPLEMENTAL FIGURE 2: Risk of Bias Assessment

Green dot = low risk of bias; red dot = high risk of bias; ACH = ablation in Coronary heart disease; SMASH-VT = Substrate Mapping and Ablation in Sinus rhythm to Halt Ventricular Tachycardia; SMS = Substrate Modification Study; VTACH = Ventricular Tachycardia Ablation in Coronary Heart disease.

|                      | Random sequence generation (selection bias) | Allocation concealment (selection bias) | Blinding of participants and personnel (performance bias) | Blinding of outcome assessment (detection bias) | Incomplete outcome data (attrition bias) | Selective reporting (reporting bias) | Other bias |
|----------------------|---------------------------------------------|-----------------------------------------|-----------------------------------------------------------|-------------------------------------------------|------------------------------------------|--------------------------------------|------------|
| SMASH-VT Reddy et al | ●                                           | ●                                       | ●                                                         | ●                                               | +                                        | +                                    | ●          |
| SMS Kuck et al       | +                                           | ●                                       | ●                                                         | ●                                               | +                                        | +                                    | ●          |
| VTACH Kuck et al     | +                                           | +                                       | ●                                                         | ●                                               | +                                        | +                                    | ●          |
